# Supplementary material for: CD44-Mediated Poor Prognosis in Glioma Is Associated With M2-Polarization of Tumor-Associated Macrophages and Immunosuppression
Source: Front Surg. 2022 Feb 3;8:775194. doi: 10.3389/fsurg.2021.775194 (PMC8850306; doi:10.3389/fsurg.2021.775194)
Supplement: Supplementary file 20 [file Table_7.xlsx]

## Sheet: Sheet1
DEGs in CD44+ Malignant Cell
Biological Process
ID	Description	p.adjust
GO:0051384	response to glucocorticoid	8.09957e-06
GO:0031960	response to corticosteroid	1.10825e-05
GO:0061041	regulation of wound healing	4.29402e-05
GO:0046677	response to antibiotic	4.29402e-05
GO:0032496	response to lipopolysaccharide	4.29402e-05
GO:0009612	response to mechanical stimulus	4.29402e-05
GO:0019216	regulation of lipid metabolic process	4.29402e-05
GO:0002237	response to molecule of bacterial origin	4.29402e-05
GO:0002526	acute inflammatory response	4.29402e-05
GO:0043903	regulation of symbiosis, encompassing mutualism through parasitism	4.29402e-05
GO:0051702	interaction with symbiont	4.29402e-05
GO:0048146	positive regulation of fibroblast proliferation	4.52284e-05
GO:0048608	reproductive structure development	4.54029e-05
GO:0061458	reproductive system development	4.54029e-05
GO:0002576	platelet degranulation	4.54029e-05
GO:1903034	regulation of response to wounding	4.68745e-05
GO:0052547	regulation of peptidase activity	6.0389e-05
GO:0097755	positive regulation of blood vessel diameter	6.99081e-05
GO:0007565	female pregnancy	6.99081e-05
GO:0070371	ERK1 and ERK2 cascade	6.99081e-05
GO:0051591	response to cAMP	7.15403e-05
GO:0046890	regulation of lipid biosynthetic process	7.98107e-05
GO:0016485	protein processing	8.511e-05
GO:0043312	neutrophil degranulation	9.47011e-05
GO:0002283	neutrophil activation involved in immune response	9.60219e-05
GO:0007517	muscle organ development	9.60219e-05
GO:0050792	regulation of viral process	9.81667e-05
GO:1990000	amyloid fibril formation	9.96513e-05
GO:0071276	cellular response to cadmium ion	0.000100762
GO:0042119	neutrophil activation	0.000100762
GO:0002446	neutrophil mediated immunity	0.000100762
GO:0044706	multi-multicellular organism process	0.000142217
GO:0043687	post-translational protein modification	0.000151273
GO:1904018	positive regulation of vasculature development	0.000179222
GO:0051851	modification by host of symbiont morphology or physiology	0.000181753
GO:0000302	response to reactive oxygen species	0.000181753
GO:0030193	regulation of blood coagulation	0.000202444
GO:1900046	regulation of hemostasis	0.00021225
GO:0002683	negative regulation of immune system process	0.000224533
GO:0070613	regulation of protein processing	0.000224533
GO:0048545	response to steroid hormone	0.000224533
GO:0051346	negative regulation of hydrolase activity	0.000224533
GO:1903317	regulation of protein maturation	0.000227353
GO:0048145	regulation of fibroblast proliferation	0.000227504
GO:0048144	fibroblast proliferation	0.000233419
GO:0050818	regulation of coagulation	0.000233419
GO:0051604	protein maturation	0.000264784
GO:0046683	response to organophosphorus	0.000274311
GO:0071248	cellular response to metal ion	0.000274311
GO:0050727	regulation of inflammatory response	0.000283664
GO:1901654	response to ketone	0.000295829
GO:0031579	membrane raft organization	0.000303866
GO:0072376	protein activation cascade	0.000343584
GO:0030099	myeloid cell differentiation	0.000356241
GO:0035296	regulation of tube diameter	0.000356241
GO:0050880	regulation of blood vessel size	0.000356241
GO:0097746	regulation of blood vessel diameter	0.000356241
GO:0035150	regulation of tube size	0.000366507
GO:1901342	regulation of vasculature development	0.000376166
GO:0002573	myeloid leukocyte differentiation	0.000377722
GO:0052548	regulation of endopeptidase activity	0.000388914
GO:0070997	neuron death	0.0004093
GO:0072378	blood coagulation, fibrin clot formation	0.00040953
GO:0014074	response to purine-containing compound	0.00041547
GO:0048525	negative regulation of viral process	0.000428915
GO:0071385	cellular response to glucocorticoid stimulus	0.000431405
GO:0030301	cholesterol transport	0.00044091
GO:0006959	humoral immune response	0.000454765
GO:0044788	modulation by host of viral process	0.000495019
GO:0060441	epithelial tube branching involved in lung morphogenesis	0.000495019
GO:0071241	cellular response to inorganic substance	0.000500598
GO:0071384	cellular response to corticosteroid stimulus	0.000507429
GO:0010038	response to metal ion	0.000513553
GO:0032102	negative regulation of response to external stimulus	0.00051877
GO:0045657	positive regulation of monocyte differentiation	0.000519302
GO:0006979	response to oxidative stress	0.000543776
GO:0046686	response to cadmium ion	0.000556212
GO:0032526	response to retinoic acid	0.000585837
GO:0051098	regulation of binding	0.000585837
GO:0035821	modification of morphology or physiology of other organism	0.000620518
GO:0042311	vasodilation	0.000626665
GO:0050678	regulation of epithelial cell proliferation	0.000626665
GO:0070372	regulation of ERK1 and ERK2 cascade	0.000626665
GO:0015918	sterol transport	0.000664915
GO:0051817	modification of morphology or physiology of other organism involved in	0.000664915
GO:0051100	negative regulation of binding	0.000700797
GO:0035914	skeletal muscle cell differentiation	0.00070777
GO:0050918	positive chemotaxis	0.00070777
GO:0043901	negative regulation of multi-organism process	0.000729788
GO:0030449	regulation of complement activation	0.000729788
GO:2000257	regulation of protein activation cascade	0.00075811
GO:0003018	vascular process in circulatory system	0.000761562
GO:1901214	regulation of neuron death	0.000781101
GO:0034329	cell junction assembly	0.00080458
GO:0001936	regulation of endothelial cell proliferation	0.000823592
GO:0030224	monocyte differentiation	0.000853855
GO:0071709	membrane assembly	0.000853855
GO:1903131	mononuclear cell differentiation	0.000853855
GO:0097237	cellular response to toxic substance	0.000909143
GO:0001765	membrane raft assembly	0.000909143
GO:0060712	spongiotrophoblast layer development	0.000909143
GO:0043900	regulation of multi-organism process	0.000916105
GO:0071621	granulocyte chemotaxis	0.000932831
GO:0010951	negative regulation of endopeptidase activity	0.000944224
GO:0060537	muscle tissue development	0.000947257
GO:0019058	viral life cycle	0.000987897
GO:0001937	negative regulation of endothelial cell proliferation	0.000990555
GO:0061045	negative regulation of wound healing	0.000990555
GO:0001655	urogenital system development	0.00099911
GO:0051924	regulation of calcium ion transport	0.00099911
GO:0007596	blood coagulation	0.00113743
GO:0001935	endothelial cell proliferation	0.0011771
GO:0071496	cellular response to external stimulus	0.00119023
GO:0010466	negative regulation of peptidase activity	0.00119023
GO:0098754	detoxification	0.00119023
GO:0044091	membrane biogenesis	0.00120968
GO:0007599	hemostasis	0.00120968
GO:0050817	coagulation	0.00121874
GO:0032352	positive regulation of hormone metabolic process	0.00121874
GO:0001101	response to acid chemical	0.00123389
GO:0002920	regulation of humoral immune response	0.00128381
GO:0031099	regeneration	0.00135703
GO:0050673	epithelial cell proliferation	0.00135839
GO:0046889	positive regulation of lipid biosynthetic process	0.00139721
GO:0045766	positive regulation of angiogenesis	0.00159844
GO:0097530	granulocyte migration	0.00163673
GO:1904035	regulation of epithelial cell apoptotic process	0.00170424
GO:0060711	labyrinthine layer development	0.00174342
GO:0097529	myeloid leukocyte migration	0.00183907
GO:0001656	metanephros development	0.00183907
GO:1903035	negative regulation of response to wounding	0.00183907
GO:0042542	response to hydrogen peroxide	0.00189478
GO:0007597	blood coagulation, intrinsic pathway	0.00190589
GO:0035994	response to muscle stretch	0.00190589
GO:1900153	positive regulation of nuclear-transcribed mRNA catabolic process, dea	0.00190589
GO:0071236	cellular response to antibiotic	0.00190969
GO:0030850	prostate gland development	0.00192756
GO:0051592	response to calcium ion	0.00195374
GO:0034330	cell junction organization	0.00199867
GO:1903900	regulation of viral life cycle	0.00199867
GO:0042110	T cell activation	0.00206035
GO:0002931	response to ischemia	0.00216294
GO:0060425	lung morphogenesis	0.00216294
GO:0050810	regulation of steroid biosynthetic process	0.00216294
GO:0045807	positive regulation of endocytosis	0.0022325
GO:0045765	regulation of angiogenesis	0.00235249
GO:1903707	negative regulation of hemopoiesis	0.00236478
GO:0032462	regulation of protein homooligomerization	0.00237194
GO:0045655	regulation of monocyte differentiation	0.00237194
GO:1900151	regulation of nuclear-transcribed mRNA catabolic process, deadenylatio	0.00237194
GO:0030595	leukocyte chemotaxis	0.00237194
GO:0034599	cellular response to oxidative stress	0.00240641
GO:0001649	osteoblast differentiation	0.00240641
GO:0060326	cell chemotaxis	0.00249954
GO:0030195	negative regulation of blood coagulation	0.00249954
GO:0038066	p38MAPK cascade	0.00249954
GO:0002673	regulation of acute inflammatory response	0.00254551
GO:0007519	skeletal muscle tissue development	0.00258966
GO:0060713	labyrinthine layer morphogenesis	0.00258966
GO:0002763	positive regulation of myeloid leukocyte differentiation	0.00258966
GO:0043392	negative regulation of DNA binding	0.00258966
GO:1900047	negative regulation of hemostasis	0.00258966
GO:0010959	regulation of metal ion transport	0.00260692
GO:0010876	lipid localization	0.00290114
GO:0050819	negative regulation of coagulation	0.0031398
GO:0031667	response to nutrient levels	0.00314354
GO:0050900	leukocyte migration	0.00314354
GO:0034614	cellular response to reactive oxygen species	0.00321027
GO:0032373	positive regulation of sterol transport	0.00322605
GO:0032376	positive regulation of cholesterol transport	0.00322605
GO:0060538	skeletal muscle organ development	0.00324543
GO:0007568	aging	0.00324543
GO:1904019	epithelial cell apoptotic process	0.00374098
GO:0006956	complement activation	0.00386523
GO:0045637	regulation of myeloid cell differentiation	0.00411497
GO:0060669	embryonic placenta morphogenesis	0.00452545
GO:0010565	regulation of cellular ketone metabolic process	0.00455513
GO:0002761	regulation of myeloid leukocyte differentiation	0.00463932
GO:0061138	morphogenesis of a branching epithelium	0.00463932
GO:0003014	renal system process	0.00515807
GO:0015850	organic hydroxy compound transport	0.00515807
GO:0001516	prostaglandin biosynthetic process	0.00544456
GO:0046457	prostanoid biosynthetic process	0.00544456
GO:0051260	protein homooligomerization	0.0055336
GO:0019915	lipid storage	0.00553739
GO:0031668	cellular response to extracellular stimulus	0.00574692
GO:0042594	response to starvation	0.00574692
GO:0019218	regulation of steroid metabolic process	0.00574822
GO:0009314	response to radiation	0.00580131
GO:0071280	cellular response to copper ion	0.005828
GO:0046596	regulation of viral entry into host cell	0.00638736
GO:0002460	adaptive immune response based on somatic recombination of immune rece	0.00638736
GO:0001763	morphogenesis of a branching structure	0.00638736
GO:0045861	negative regulation of proteolysis	0.00652657
GO:0045862	positive regulation of proteolysis	0.00652657
GO:0006869	lipid transport	0.00673333
GO:1903524	positive regulation of blood circulation	0.00681944
GO:0030100	regulation of endocytosis	0.00717147
GO:0051348	negative regulation of transferase activity	0.00776038
GO:0070555	response to interleukin-1	0.00822196
GO:0007162	negative regulation of cell adhesion	0.00830804
GO:0007623	circadian rhythm	0.00830804
GO:1901215	negative regulation of neuron death	0.00830804
GO:0006958	complement activation, classical pathway	0.00835484
GO:0043407	negative regulation of MAP kinase activity	0.00842717
GO:0001570	vasculogenesis	0.00880014
GO:0048511	rhythmic process	0.00914717
GO:0070374	positive regulation of ERK1 and ERK2 cascade	0.00964189
GO:0014706	striated muscle tissue development	0.00974575
GO:1905954	positive regulation of lipid localization	0.0099356
GO:0097242	amyloid-beta clearance	0.00999936

## Sheet: Sheet2
DEGs in CD44+ Malignant Cell
KEGG Pathway
ID	Description	p.adjust
hsa04610	Complement and coagulation cascades	6.51464e-05
hsa05418	Fluid shear stress and atherosclerosis	0.00134817
hsa04668	TNF signaling pathway	0.00143556
hsa05133	Pertussis	0.00143556
hsa04380	Osteoclast differentiation	0.00264941
hsa04657	IL-17 signaling pathway	0.00317906
hsa05142	Chagas disease	0.00428317
hsa04510	Focal adhesion	0.0250957
hsa04933	AGE-RAGE signaling pathway in diabetic complications	0.0250957
hsa05171	Coronavirus disease - COVID-19	0.0472329

## Sheet: Sheet3
DEGs in CD44- Malignant Cell
Biological Process
ID	Description	p.adjust
GO:0045047	protein targeting to ER	2.75261e-05
GO:0072599	establishment of protein localization to endoplasmic reticulum	2.75261e-05
GO:0048709	oligodendrocyte differentiation	5.88536e-05
GO:0070972	protein localization to endoplasmic reticulum	5.88536e-05
GO:0006614	SRP-dependent cotranslational protein targeting to membrane	7.6277e-05
GO:0006613	cotranslational protein targeting to membrane	8.21737e-05
GO:0000184	nuclear-transcribed mRNA catabolic process, nonsense-mediated decay	0.000135838
GO:0010721	negative regulation of cell development	0.000248029
GO:0010001	glial cell differentiation	0.000485322
GO:0050768	negative regulation of neurogenesis	0.000485322
GO:0051961	negative regulation of nervous system development	0.000753492
GO:0019083	viral transcription	0.00106634
GO:0006605	protein targeting	0.00115987
GO:0019080	viral gene expression	0.00150179
GO:0006413	translational initiation	0.00150179
GO:0006402	mRNA catabolic process	0.00165634
GO:0006612	protein targeting to membrane	0.00178106
GO:0031115	negative regulation of microtubule polymerization	0.00183315
GO:0000956	nuclear-transcribed mRNA catabolic process	0.00186637
GO:0042063	gliogenesis	0.00189468
GO:0006401	RNA catabolic process	0.00250414
GO:0033273	response to vitamin	0.0030506
GO:0048714	positive regulation of oligodendrocyte differentiation	0.00863408
GO:0042255	ribosome assembly	0.00939019

## Sheet: Sheet4
DEGs in CD44- Malignant Cell
KEGG Pathway
ID	Description	p.adjust
hsa03010	Ribosome	0.000161319
hsa01524	Platinum drug resistance	0.00232401
hsa05171	Coronavirus disease - COVID-19	0.00755198
hsa05012	Parkinson disease	0.00876135

## Sheet: Sheet5
CD44 Positive Related Genes in CD44+ Malignant Cell
Biological Process
ID	Description	p.adjust
GO:0002526	acute inflammatory response	1.22192e-07
GO:0043062	extracellular structure organization	2.21897e-06
GO:0030198	extracellular matrix organization	2.27855e-06
GO:0002697	regulation of immune effector process	3.36052e-06
GO:0032496	response to lipopolysaccharide	3.49182e-06
GO:0002237	response to molecule of bacterial origin	4.13622e-06
GO:0050727	regulation of inflammatory response	4.13622e-06
GO:0071346	cellular response to interferon-gamma	5.34625e-06
GO:0060326	cell chemotaxis	7.52933e-06
GO:0034341	response to interferon-gamma	1.10908e-05
GO:0001503	ossification	1.4467e-05
GO:0002673	regulation of acute inflammatory response	1.63435e-05
GO:0030595	leukocyte chemotaxis	2.5282e-05
GO:0071621	granulocyte chemotaxis	2.5282e-05
GO:0006959	humoral immune response	2.5282e-05
GO:1904018	positive regulation of vasculature development	2.59242e-05
GO:0002460	adaptive immune response based on somatic recombination of immune rece	2.59242e-05
GO:0031392	regulation of prostaglandin biosynthetic process	3.40968e-05
GO:0060333	interferon-gamma-mediated signaling pathway	3.82174e-05
GO:0002683	negative regulation of immune system process	4.52823e-05
GO:0097530	granulocyte migration	5.00552e-05
GO:2001279	regulation of unsaturated fatty acid biosynthetic process	5.59952e-05
GO:0045766	positive regulation of angiogenesis	7.07587e-05
GO:0097529	myeloid leukocyte migration	8.63999e-05
GO:0030449	regulation of complement activation	0.000138637
GO:0001649	osteoblast differentiation	0.000138637
GO:2000257	regulation of protein activation cascade	0.000138637
GO:0032102	negative regulation of response to external stimulus	0.000138637
GO:0002544	chronic inflammatory response	0.000161445
GO:0051346	negative regulation of hydrolase activity	0.000214282
GO:0070613	regulation of protein processing	0.000214282
GO:1903317	regulation of protein maturation	0.000222125
GO:0002576	platelet degranulation	0.000222125
GO:0002920	regulation of humoral immune response	0.000292373
GO:0002685	regulation of leukocyte migration	0.00035671
GO:0050900	leukocyte migration	0.000363375
GO:0072376	protein activation cascade	0.000363631
GO:0050852	T cell receptor signaling pathway	0.000389994
GO:1901342	regulation of vasculature development	0.000389994
GO:0006636	unsaturated fatty acid biosynthetic process	0.000389994
GO:0046456	icosanoid biosynthetic process	0.000413469
GO:0071222	cellular response to lipopolysaccharide	0.000413469
GO:1901570	fatty acid derivative biosynthetic process	0.000497216
GO:0071219	cellular response to molecule of bacterial origin	0.000504515
GO:0001516	prostaglandin biosynthetic process	0.000519917
GO:0046457	prostanoid biosynthetic process	0.000519917
GO:0002504	antigen processing and presentation of peptide or polysaccharide antig	0.000540302
GO:0030593	neutrophil chemotaxis	0.000591537
GO:0031214	biomineral tissue development	0.000734029
GO:0045765	regulation of angiogenesis	0.000833156
GO:0044793	negative regulation by host of viral process	0.000852242
GO:0002688	regulation of leukocyte chemotaxis	0.000893871
GO:0030282	bone mineralization	0.000893871
GO:0071216	cellular response to biotic stimulus	0.000893871
GO:0034612	response to tumor necrosis factor	0.000939612
GO:0050663	cytokine secretion	0.000972479
GO:0006956	complement activation	0.00099868
GO:1990266	neutrophil migration	0.00100668
GO:0022407	regulation of cell-cell adhesion	0.00109141
GO:1903034	regulation of response to wounding	0.00109703
GO:0032103	positive regulation of response to external stimulus	0.00111224
GO:0031665	negative regulation of lipopolysaccharide-mediated signaling pathway	0.00120657
GO:0016485	protein processing	0.00121442
GO:0048246	macrophage chemotaxis	0.00129796
GO:0034356	NAD biosynthesis via nicotinamide riboside salvage pathway	0.00145959
GO:0006958	complement activation, classical pathway	0.00200475
GO:0006692	prostanoid metabolic process	0.00200475
GO:0006693	prostaglandin metabolic process	0.00200475
GO:0002822	regulation of adaptive immune response based on somatic recombination	0.00268738
GO:0071674	mononuclear cell migration	0.00269815
GO:0006953	acute-phase response	0.00273407
GO:0007162	negative regulation of cell adhesion	0.00281087
GO:0061041	regulation of wound healing	0.00284501
GO:0071356	cellular response to tumor necrosis factor	0.00286922
GO:0002455	humoral immune response mediated by circulating immunoglobulin	0.00294303
GO:0050777	negative regulation of immune response	0.00294303
GO:0016064	immunoglobulin mediated immune response	0.00297749
GO:0042116	macrophage activation	0.00309086
GO:0002429	immune response-activating cell surface receptor signaling pathway	0.00309086
GO:0019724	B cell mediated immunity	0.00309086
GO:0070661	leukocyte proliferation	0.00309086
GO:1990868	response to chemokine	0.00324867
GO:1990869	cellular response to chemokine	0.00324867
GO:0019886	antigen processing and presentation of exogenous peptide antigen via M	0.00334076
GO:0019882	antigen processing and presentation	0.00334076
GO:1903037	regulation of leukocyte cell-cell adhesion	0.00334076
GO:0048871	multicellular organismal homeostasis	0.00347181
GO:1905517	macrophage migration	0.00351028
GO:0050867	positive regulation of cell activation	0.00351028
GO:0002819	regulation of adaptive immune response	0.00351525
GO:2001234	negative regulation of apoptotic signaling pathway	0.00351525
GO:0002495	antigen processing and presentation of peptide antigen via MHC class I	0.00354759
GO:0051604	protein maturation	0.0035566
GO:0070206	protein trimerization	0.00356752
GO:2000379	positive regulation of reactive oxygen species metabolic process	0.00359887
GO:1902106	negative regulation of leukocyte differentiation	0.00367661
GO:0050863	regulation of T cell activation	0.00367661
GO:0042304	regulation of fatty acid biosynthetic process	0.00367661
GO:0045785	positive regulation of cell adhesion	0.00371091
GO:0042119	neutrophil activation	0.00371091
GO:0050851	antigen receptor-mediated signaling pathway	0.00371091
GO:0045723	positive regulation of fatty acid biosynthetic process	0.00382553
GO:1901568	fatty acid derivative metabolic process	0.00389788
GO:0033002	muscle cell proliferation	0.00389788
GO:0048660	regulation of smooth muscle cell proliferation	0.00409372
GO:0031663	lipopolysaccharide-mediated signaling pathway	0.00418165
GO:0043901	negative regulation of multi-organism process	0.00424254
GO:0048659	smooth muscle cell proliferation	0.00424254
GO:0030099	myeloid cell differentiation	0.00426784
GO:0046677	response to antibiotic	0.00426784
GO:2000351	regulation of endothelial cell apoptotic process	0.00426784
GO:0033559	unsaturated fatty acid metabolic process	0.00435061
GO:0097237	cellular response to toxic substance	0.00439032
GO:0046697	decidualization	0.00446696
GO:0002478	antigen processing and presentation of exogenous peptide antigen	0.00451592
GO:0010951	negative regulation of endopeptidase activity	0.00460421
GO:0050701	interleukin-1 secretion	0.00460828
GO:0006690	icosanoid metabolic process	0.00483691
GO:0031664	regulation of lipopolysaccharide-mediated signaling pathway	0.00483691
GO:0007159	leukocyte cell-cell adhesion	0.00483691
GO:0048771	tissue remodeling	0.00484899
GO:0032612	interleukin-1 production	0.00489909
GO:0022409	positive regulation of cell-cell adhesion	0.00489909
GO:0019884	antigen processing and presentation of exogenous antigen	0.00517462
GO:0060135	maternal process involved in female pregnancy	0.00519352
GO:0002548	monocyte chemotaxis	0.00542676
GO:0072577	endothelial cell apoptotic process	0.00542676
GO:0010466	negative regulation of peptidase activity	0.00554858
GO:0072378	blood coagulation, fibrin clot formation	0.00557974
GO:0002698	negative regulation of immune effector process	0.00557974
GO:0045428	regulation of nitric oxide biosynthetic process	0.00557974
GO:0002449	lymphocyte mediated immunity	0.00583935
GO:0048002	antigen processing and presentation of peptide antigen	0.00583935
GO:0019730	antimicrobial humoral response	0.00583935
GO:1903409	reactive oxygen species biosynthetic process	0.00583935
GO:0050918	positive chemotaxis	0.00602821
GO:0007565	female pregnancy	0.00623739
GO:1902105	regulation of leukocyte differentiation	0.00645136
GO:0044788	modulation by host of viral process	0.00649837
GO:0002687	positive regulation of leukocyte migration	0.00702411
GO:0046890	regulation of lipid biosynthetic process	0.00713806
GO:0046394	carboxylic acid biosynthetic process	0.00713806
GO:0016053	organic acid biosynthetic process	0.00720006
GO:0001819	positive regulation of cytokine production	0.00721255
GO:0042110	T cell activation	0.00721255
GO:0002675	positive regulation of acute inflammatory response	0.0075573
GO:0050870	positive regulation of T cell activation	0.00761324
GO:0050710	negative regulation of cytokine secretion	0.00765441
GO:0072593	reactive oxygen species metabolic process	0.00773737
GO:0002573	myeloid leukocyte differentiation	0.00785998
GO:1903706	regulation of hemopoiesis	0.0082019
GO:0070555	response to interleukin-1	0.00837778
GO:0002696	positive regulation of leukocyte activation	0.00844683
GO:0006809	nitric oxide biosynthetic process	0.00855614
GO:0050707	regulation of cytokine secretion	0.00886218
GO:0051271	negative regulation of cellular component movement	0.00887408
GO:0043312	neutrophil degranulation	0.0091021
GO:0051249	regulation of lymphocyte activation	0.0091021
GO:0002283	neutrophil activation involved in immune response	0.00945238
GO:0001893	maternal placenta development	0.00982969
GO:0045622	regulation of T-helper cell differentiation	0.00982969
GO:0002699	positive regulation of immune effector process	0.00982969

## Sheet: Sheet6
CD44 Positive Related Genes in CD44+ Malignant Cell
KEGG Pathway
ID	Description	p.adjust
hsa04145	Phagosome	1.7596e-05
hsa04610	Complement and coagulation cascades	1.7596e-05
hsa05150	Staphylococcus aureus infection	3.027e-05
hsa05322	Systemic lupus erythematosus	3.04088e-05
hsa05416	Viral myocarditis	0.000160935
hsa05323	Rheumatoid arthritis	0.000160935
hsa05330	Allograft rejection	0.000206514
hsa05332	Graft-versus-host disease	0.000299123
hsa04940	Type I diabetes mellitus	0.000299123
hsa05133	Pertussis	0.000343458
hsa05140	Leishmaniasis	0.000343458
hsa04612	Antigen processing and presentation	0.000343458
hsa05320	Autoimmune thyroid disease	0.000582185
hsa05310	Asthma	0.000939766
hsa04514	Cell adhesion molecules	0.00136401
hsa05164	Influenza A	0.00310457
hsa05152	Tuberculosis	0.00385098
hsa04672	Intestinal immune network for IgA production	0.00431932
hsa04512	ECM-receptor interaction	0.00431932
hsa05144	Malaria	0.00431932
hsa04657	IL-17 signaling pathway	0.00542257
hsa04510	Focal adhesion	0.00566896
hsa05169	Epstein-Barr virus infection	0.00566896
hsa04064	NF-kappa B signaling pathway	0.00749813
hsa05321	Inflammatory bowel disease	0.00932582
hsa04668	TNF signaling pathway	0.00963614
hsa05171	Coronavirus disease - COVID-19	0.010792
hsa04621	NOD-like receptor signaling pathway	0.0139814
hsa05418	Fluid shear stress and atherosclerosis	0.0221236
hsa04658	Th1 and Th2 cell differentiation	0.0275122
hsa04640	Hematopoietic cell lineage	0.0344752
hsa04061	Viral protein interaction with cytokine and cytokine receptor	0.034593
hsa05142	Chagas disease	0.0359446
hsa04659	Th17 cell differentiation	0.0411855
hsa05134	Legionellosis	0.0417666
hsa05145	Toxoplasmosis	0.0455092
hsa00590	Arachidonic acid metabolism	0.0475594

## Sheet: Sheet7
CD44 Negative Related Genes in CD44+ Malignant Cell
Biological Process
ID	Description	p.adjust
GO:0042775	mitochondrial ATP synthesis coupled electron transport	1.32481e-27
GO:0042773	ATP synthesis coupled electron transport	1.32481e-27
GO:0022904	respiratory electron transport chain	5.13002e-26
GO:0006119	oxidative phosphorylation	8.74585e-26
GO:0022900	electron transport chain	2.16898e-23
GO:0045333	cellular respiration	4.1859e-23
GO:0015980	energy derivation by oxidation of organic compounds	8.05605e-21
GO:0046034	ATP metabolic process	8.33718e-19
GO:0009205	purine ribonucleoside triphosphate metabolic process	5.70685e-18
GO:0009167	purine ribonucleoside monophosphate metabolic process	6.18272e-18
GO:0009126	purine nucleoside monophosphate metabolic process	6.18272e-18
GO:0009199	ribonucleoside triphosphate metabolic process	6.18272e-18
GO:0009144	purine nucleoside triphosphate metabolic process	6.18272e-18
GO:0009161	ribonucleoside monophosphate metabolic process	1.20938e-17
GO:0009141	nucleoside triphosphate metabolic process	1.82712e-17
GO:0009123	nucleoside monophosphate metabolic process	3.65726e-17
GO:0006123	mitochondrial electron transport, cytochrome c to oxygen	3.94865e-17
GO:0019646	aerobic electron transport chain	3.94865e-17
GO:0009060	aerobic respiration	4.81568e-15
GO:1902600	proton transmembrane transport	1.93755e-11
GO:0006120	mitochondrial electron transport, NADH to ubiquinone	6.63159e-09
GO:0033108	mitochondrial respiratory chain complex assembly	5.96465e-07
GO:0010257	NADH dehydrogenase complex assembly	7.11538e-07
GO:0032981	mitochondrial respiratory chain complex I assembly	7.11538e-07
GO:0006614	SRP-dependent cotranslational protein targeting to membrane	2.1664e-05
GO:0006122	mitochondrial electron transport, ubiquinol to cytochrome c	2.42213e-05
GO:0006613	cotranslational protein targeting to membrane	2.58932e-05
GO:0045047	protein targeting to ER	4.28021e-05
GO:0072599	establishment of protein localization to endoplasmic reticulum	5.17711e-05
GO:0090150	establishment of protein localization to membrane	8.77702e-05
GO:0006612	protein targeting to membrane	0.000131174
GO:0070972	protein localization to endoplasmic reticulum	0.000163301
GO:0006605	protein targeting	0.000804915
GO:0021762	substantia nigra development	0.00152506
GO:0030901	midbrain development	0.00187553
GO:0070584	mitochondrion morphogenesis	0.00394647
GO:0019083	viral transcription	0.00481555
GO:0048857	neural nucleus development	0.00578956
GO:0000184	nuclear-transcribed mRNA catabolic process, nonsense-mediated decay	0.00658623
GO:0019080	viral gene expression	0.0067416

## Sheet: Sheet8
CD44 Negative Related Genes in CD44+ Malignant Cell
KEGG Pathway
ID	Description	p.adjust
hsa00190	Oxidative phosphorylation	4.32801e-27
hsa05012	Parkinson disease	4.24284e-23
hsa04932	Non-alcoholic fatty liver disease	1.8934e-21
hsa05016	Huntington disease	4.82861e-21
hsa05020	Prion disease	4.82861e-21
hsa05014	Amyotrophic lateral sclerosis	2.16243e-20
hsa04714	Thermogenesis	6.59046e-19
hsa05415	Diabetic cardiomyopathy	6.59046e-19
hsa05022	Pathways of neurodegeneration - multiple diseases	1.96834e-17
hsa05010	Alzheimer disease	8.38843e-17
hsa04260	Cardiac muscle contraction	2.62815e-14
hsa04723	Retrograde endocannabinoid signaling	0.000182628
hsa05110	Vibrio cholerae infection	0.00580382
hsa03010	Ribosome	0.0125139
